# Supplementary material
Source: publisher figshare collection journal article supplement (https://frontiersin.figshare.com/ndownloader/files/17960384)

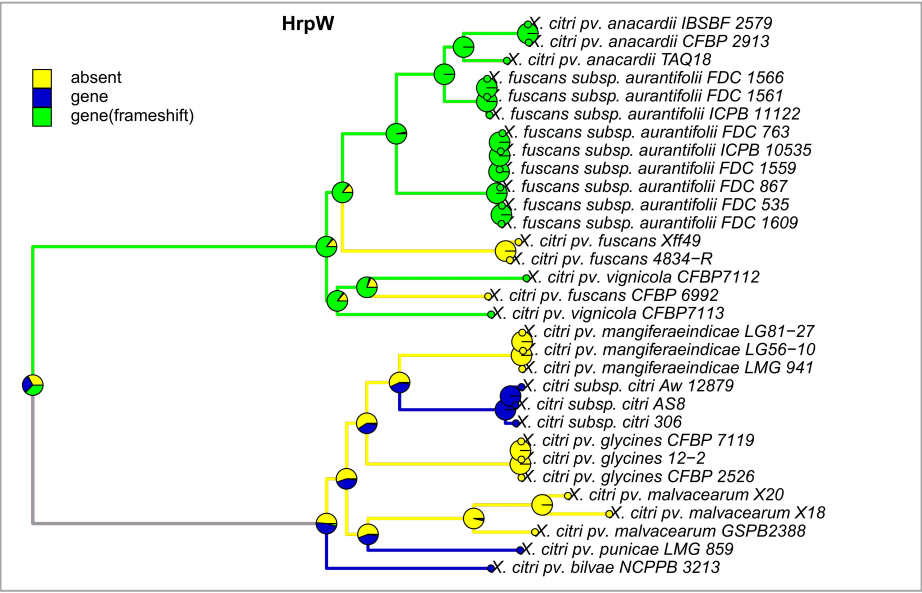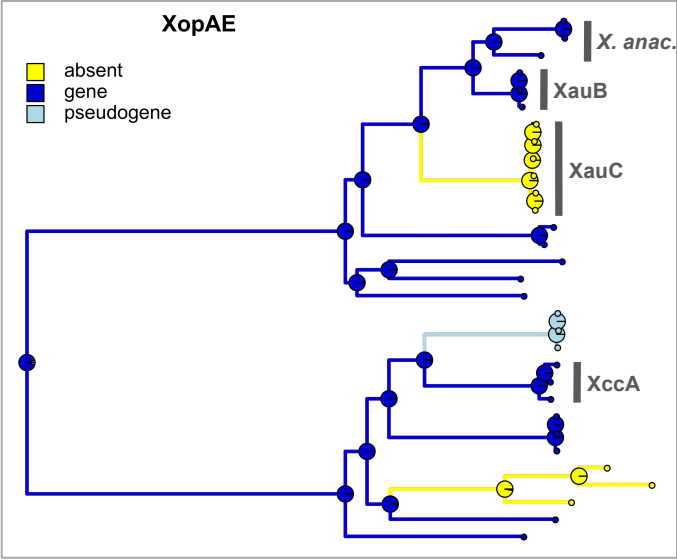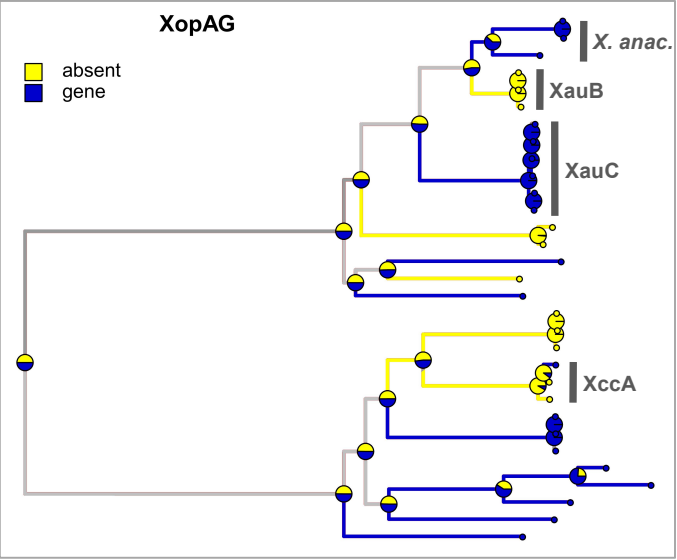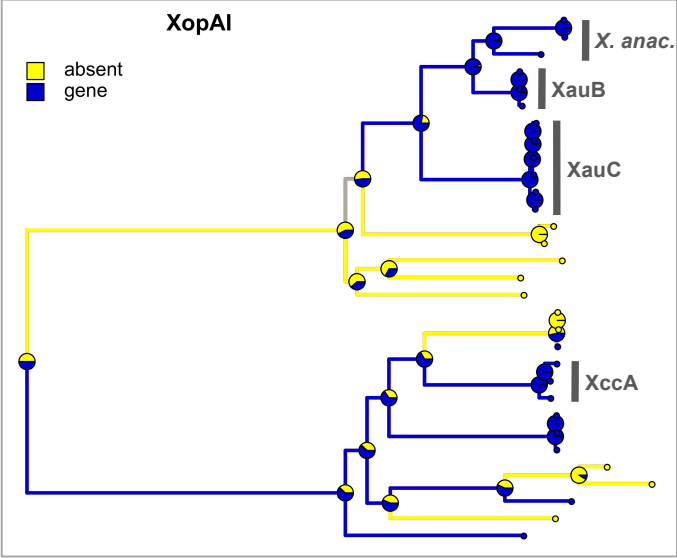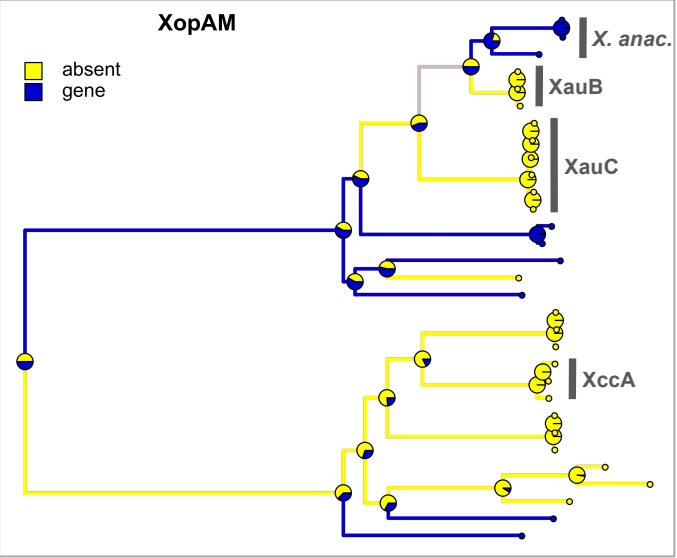

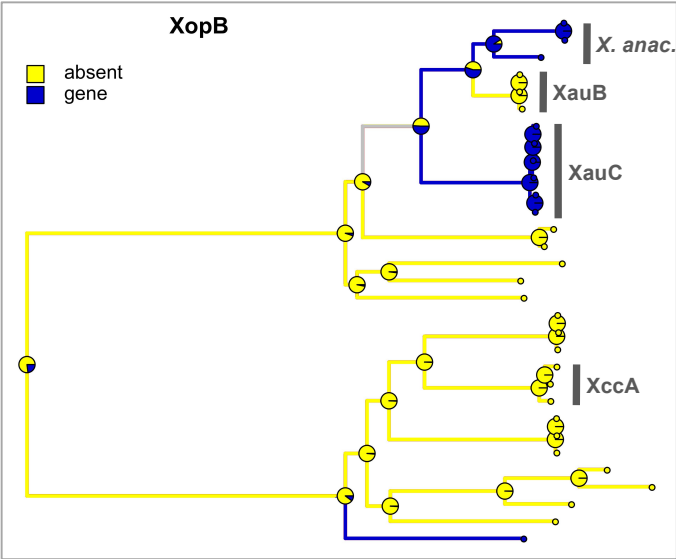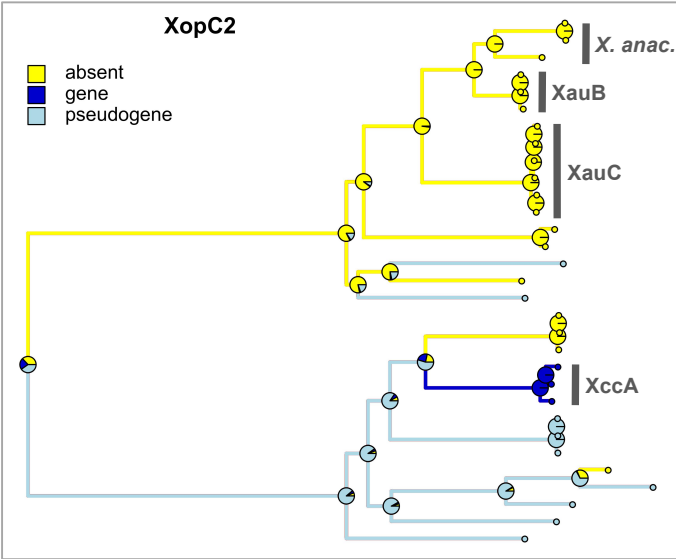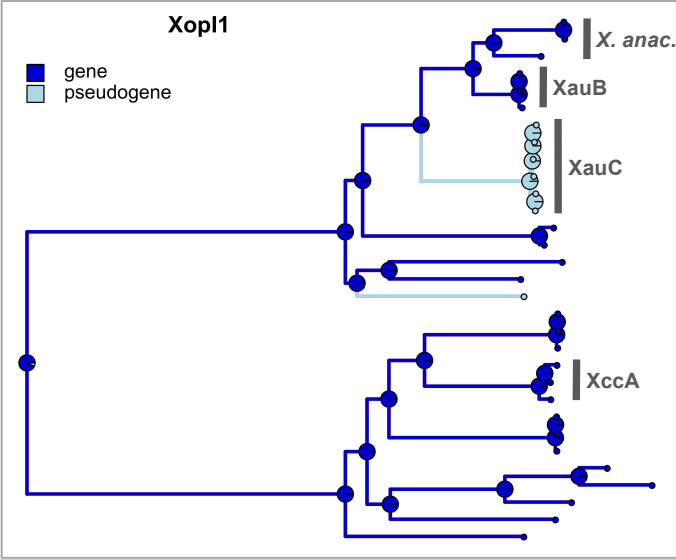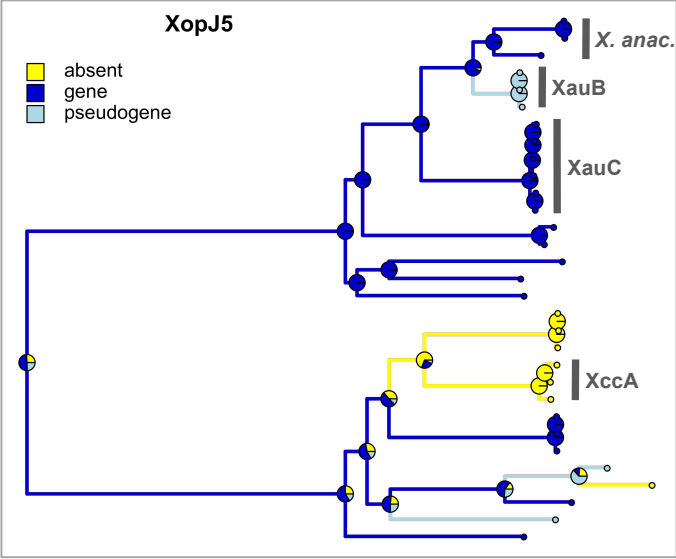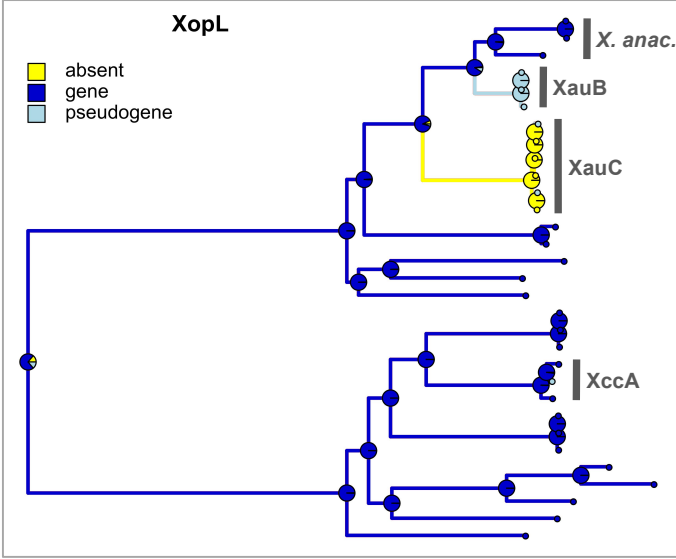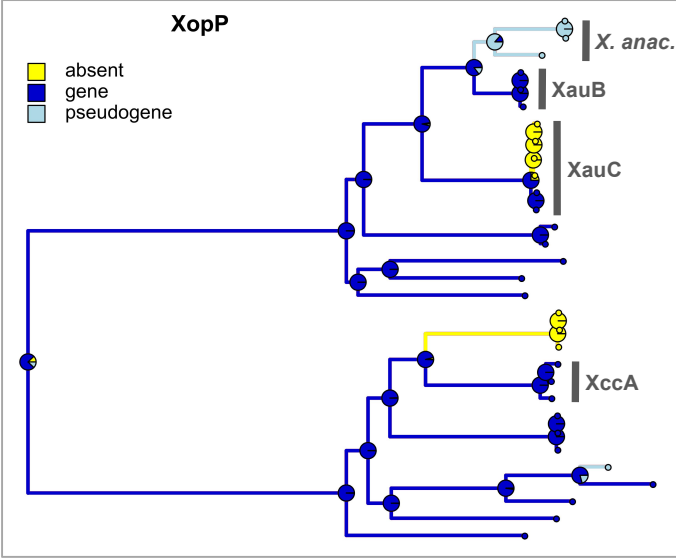

Supplement: Supplementary file [file 17960384]
